# Supplementary material for: Establishment of centromere identity is dependent on nuclear spatial organization
Source: PubMed Central journal article supplement (PMC9616734; doi:10.1016/j.cub.2022.06.048), 2022-07-25
Supplement: mmc1.pdf [file mmc1.pdf]

**Current Biology, Volume 32**

**Supplemental Information**

**Establishment of centromere identity  
is dependent on nuclear spatial organization**

**Weifang Wu, Toni McHugh, David A. Kelly, Alison L. Pidoux, and Robin C. Allshire**

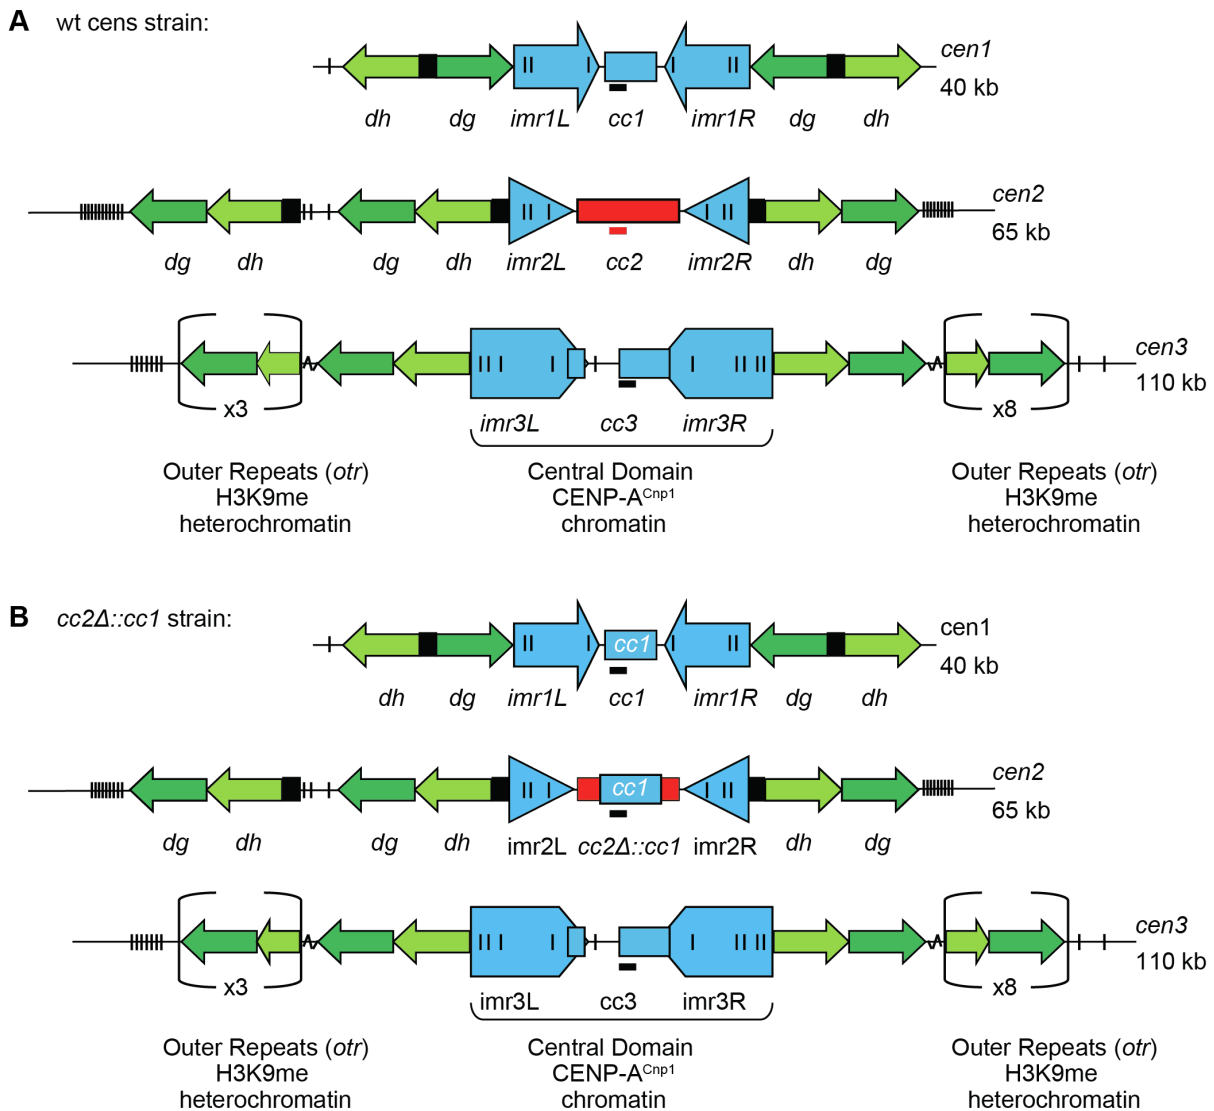

**Figure S1. Domain organization of centromeres in fission yeast. Related to Figures 1-to-7.**

(A, B) Schematic representation of the three endogenous wild-type centromeres - wt-cens (A) or *cc2Δ::cc1* strains (B). Each centromere consists of two distinct domains: a central domain assembled in CENP-A<sup>Cnp1</sup> chromatin harbouring a central core (*cc*) DNA and flanking innermost repeats (*imr*), which are surrounded by various repetitive DNA elements known as the outer repeats (*otr-dg/dh*) assembled in H3K9me-dependent heterochromatin.<sup>S1</sup> In *cc2Δ::cc1* cells,<sup>S2</sup> 6 kb of *cc2* DNA was replaced by 5.5 kb of *cc1* sequence, allowing the specific analysis of unique *cc2* DNA present in ectopic *cc2* insertions and minichromosomes pcc2 and pHcc2. Black, red bars represent qChIP primer sites on *cc1/3* (the homologous region between *cc1* and *cc3*) and *cc2* DNA, respectively.

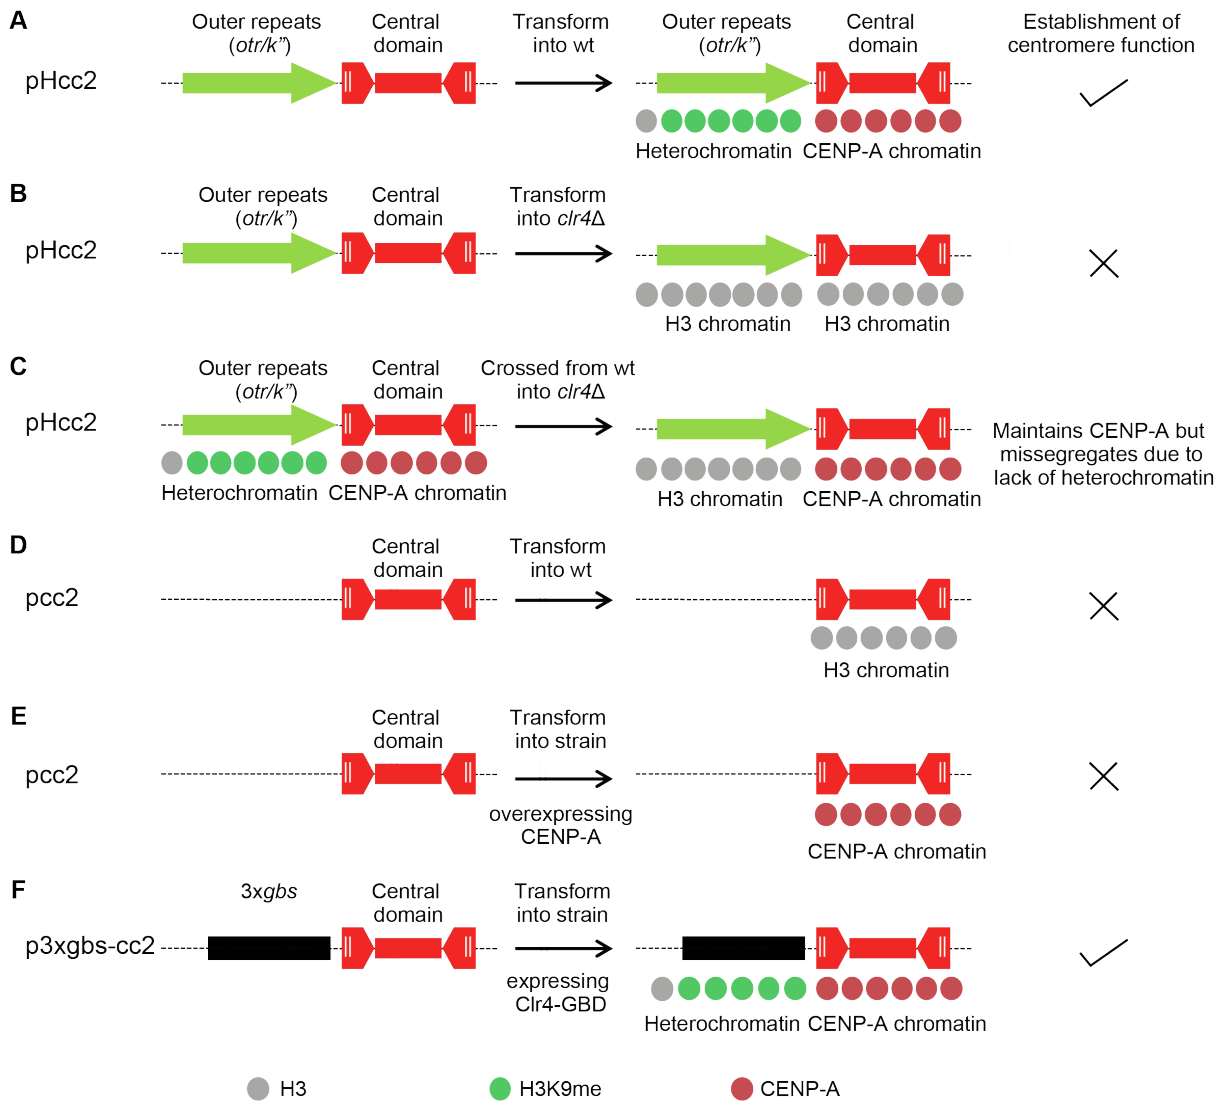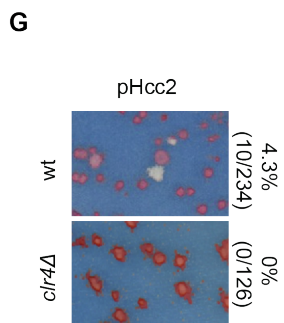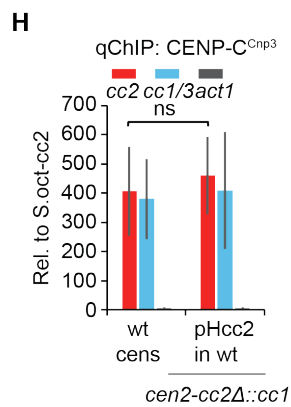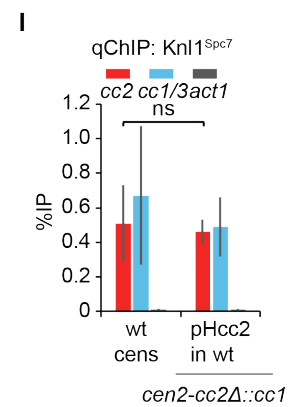

**Figure S2. Heterochromatin is required to establish CENP-A<sup>Cnp1</sup> chromatin, establish functional centromeres and recruit kinetochore proteins. Related to Figure 1.**

(A, B) pHcc2 assembles heterochromatin on outer repeats (*otr/K*) which promotes CENP-A<sup>Cnp1</sup> chromatin establishment on its central domain DNA in wild-type - wt (A) cells but not in *clr4Δ* (B) cells following transformation.<sup>S3</sup> (C) Heterochromatin is not required to maintain CENP-A<sup>Cnp1</sup> chromatin on central domain of pHcc2 in *clr4Δ* crossed from wild-type.<sup>S3</sup> Although pHcc2 maintains CENP-A<sup>Cnp1</sup> in *clr4Δ*, it does not segregate properly due to lack of heterochromatin, cohesion and biorientation function. (D, E) pcc2 assembles CENP-A<sup>Cnp1</sup> chromatin on its central domain in CENP-A<sup>Cnp1</sup> overexpressed cells (E) but not in wild-type CENP-A<sup>Cnp1</sup> cells (D) upon transformation.<sup>S2</sup> (F) p3xgbs-cc2 assembles heterochromatin on *3xgbs* (three Gal4-binding sites) that permits CENP-A<sup>Cnp1</sup> chromatin establishment on its *cc2* central domain in cells expressing Clr4-GBD (the DNA binding domain of the *S. cerevisiae* Gal4 protein) fusions following transformation. Artificial association of Clr4 with *3xgbs* bypasses the requirement for heterochromatic outer repeats (*otr/K*) in heterochromatin assembly.<sup>S4</sup> “√” indicates functional centromere can be established on plasmid-based minichromosome, whereas “x” indicates no centromere is established. Both heterochromatin and CENP-A<sup>Cnp1</sup> are required to form a functional centromere. (G) Functional centromere establishment assay on pHcc2 transformed into wt and *clr4Δ* strains carrying *cc2Δ::cc1*. The centromere establishment assay provides a measure of immediate ability to establish functional centromeres. pHcc2 plasmid can establish heterochromatin via the outer repeat region. Heterochromatin promotes establishment of CENP-A<sup>Cnp1</sup> chromatin on the central core domain (*cc2*). CENP-A<sup>Cnp1</sup> chromatin is the platform for kinetochore assembly.<sup>S3</sup> Heterochromatin also ensures proper cohesion, meaning that the plasmid can biorient on the spindle and segregate efficiently.<sup>S5,S6</sup> Both heterochromatin and CENP-A are required to form a functional centromere. For the centromere establishment assay pHcc2 was transformed into wt and *clr4Δ* strains and plated on selective plates. Transformants were promptly replica plated to low adenine-containing plates. Pale pink/white colonies indicate the presence of functional centromere since *sup3e* tRNA on pHcc2 suppresses *ade6-704* mutation within strains. Establishment frequency was calculated as the percentage of pale pink/white colonies divided by the total number of transformants (minus pure white colonies) (See also STAR Methods), thus 4.3%, 0% of colonies established functional centromeres on pHcc2 transformed into wt and *clr4Δ* cells, respectively. (H, I) qChIP analyses for CENP-C<sup>Cnp3</sup> (H), Knl1<sup>Spc7</sup> (I) levels at *cc2*, *cc1/3* and *act1* in wild-type strains carrying endogenous *cen2-cc2* or *cen2-cc2Δ::cc1* strain transformed with pHcc2. For ChIP analyses transformants were picked randomly from selective plates. Replica plating to low adenine plates was not performed. During growth to log phase for ChIP further establishment of centromeres occurs – in up to 100% of wild-type pHcc2 cultures. %IP levels in *S. pombe* were normalized to %IP of central core from spiked-in *S. octosporus* chromatin in (H). qChIP results in (I) were reported as %IP. Data are mean ± SD (n=3). ns, no significance (Unpaired t-test).

**A**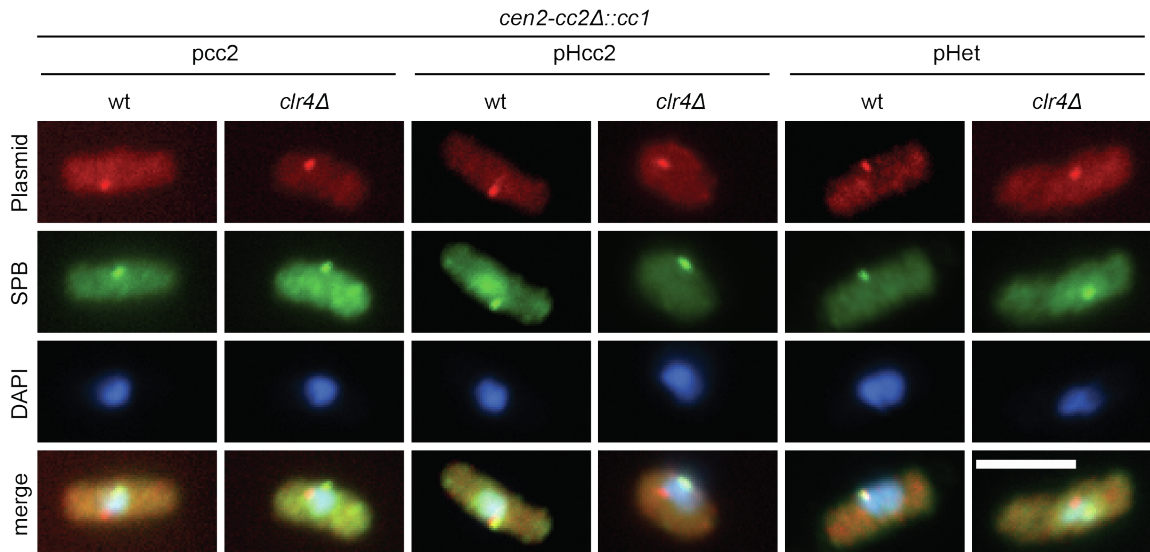**B**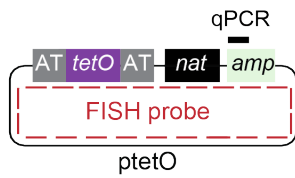**D**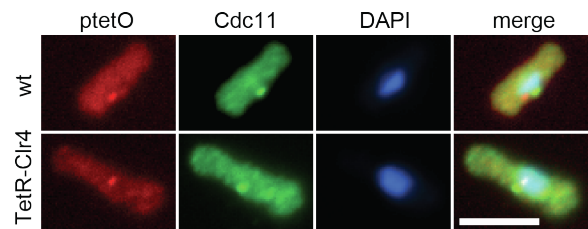**C**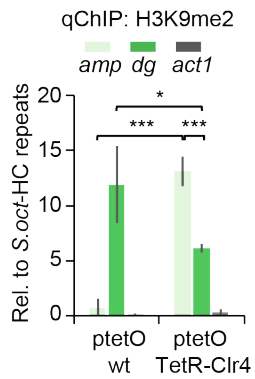**E**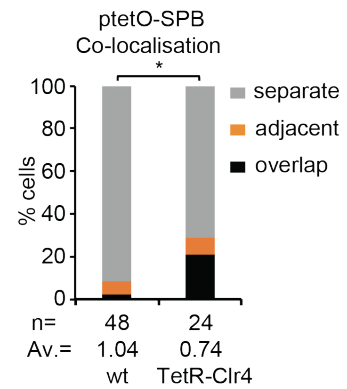

**Figure S3. The assembly of centromeric or synthetic heterochromatin increases the frequency of pHcc2, pHet and ptetO colocalization with SPBs. Related to Figure 1.**

(A) Representative images of plasmid DNA FISH (red; probe as indicated in Figure 1B), SPB location (green; anti-Cdc11) and DNA staining (blue, DAPI) in wild-type (*wt*) and *clr4* $\Delta$  cells transformed with *pcc2*, pHcc2 or pHet. Images were scaled relative to the maximum values of histogram. Scale bar, 5  $\mu$ m. (B) Diagram of ptetO minichromosome. Black bar above plasmid map represents qChIP primer site on ampicillin gene (*amp*). Dashed red line on plasmid indicates position of FISH probe. (C) qChIP analyses for H3K9me2 levels on *amp* gene of ptetO, *dg* repeats of centromeric heterochromatin and *act1* gene. (D) Representative images of ptetO plasmid DNA FISH (red; probe as indicated in A), SPB location (green; anti-Cdc11) and DNA staining (blue, DAPI) in wild-type (*wt*) and TetR-*Clr4* cells transformed with ptetO. Images were scaled relative to the maximum values of histogram. Scale bar, 5  $\mu$ m. (E) Cells were classified into three groups according to the 3D distances between ptetO and SPB (Cdc11): overlap ( $\leq 0.3$   $\mu$ m), adjacent (0.3-0.5  $\mu$ m) or separate (0.5-3  $\mu$ m). Percentage of interphase cells (n, number analyzed from 3 independent experiments) in each category. AV., average distance. ns, no significance; \*,  $p < 0.01$  (Mann-Whitney U test).

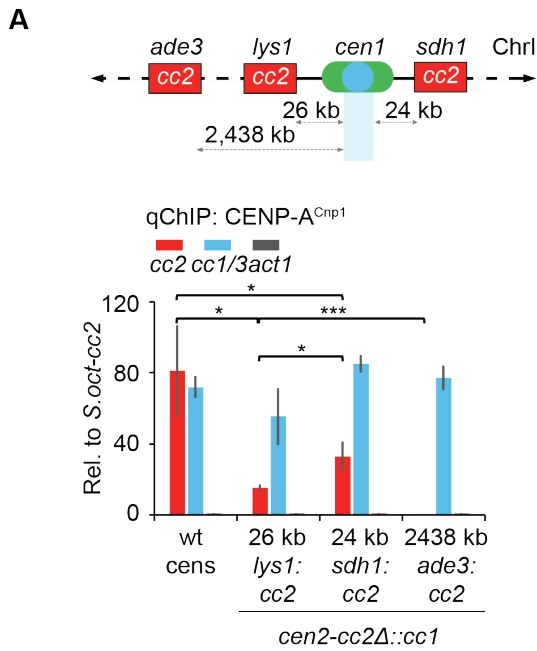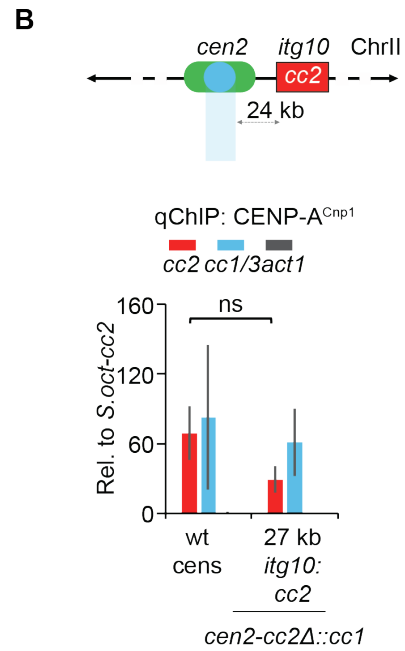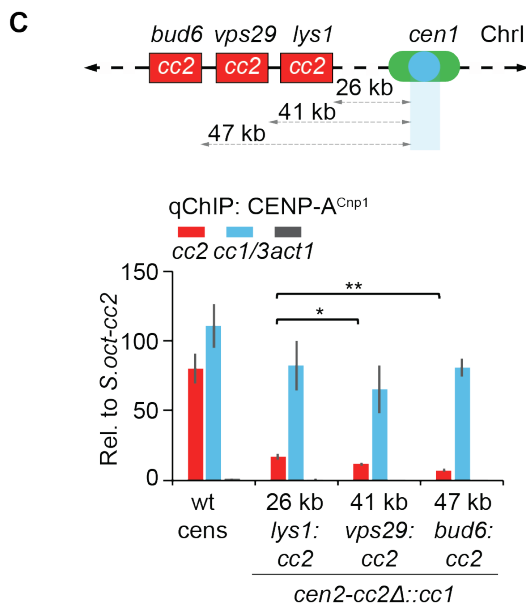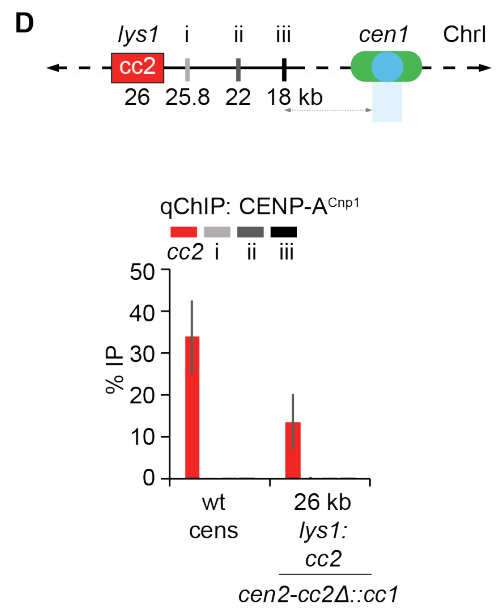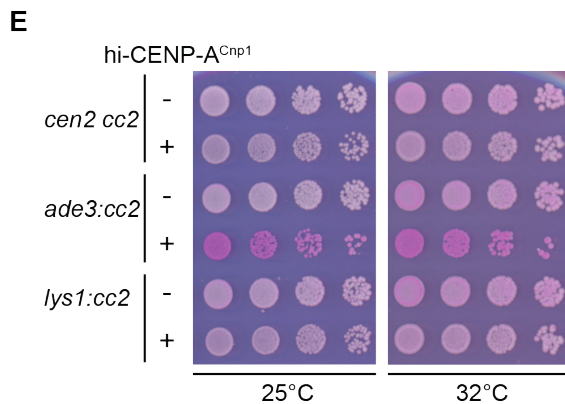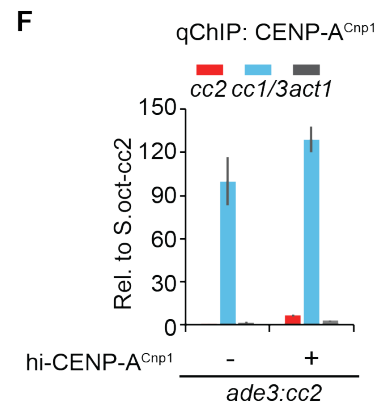

**Figure S4. CENP-A<sup>Cnp1</sup> chromatin is established on cc2 inserted closed to centromeres and CENP-A<sup>Cnp1</sup> overexpression results in defect growth of cells containing a centromere-distal ade3:cc2 insertion. Related to Figure 2.**

(A-C) qChIP analyses for CENP-A<sup>Cnp1</sup> levels at *cc2*, *cc1/3* and *act1* in wt-cens strain with *cen2-cc2* or *cc2Δ::cc1* strain with *lys1:cc2*, *sdh1:cc2*, *ade3:cc2* (A) or *itg10:cc2* (*itg10*; ChrII: 1,645,855-1,655,523; B) or *vps29:cc2* or *bud6:cc2* (C) insertion. %IP levels in *S. pombe* were normalized to %IP of central core from spiked-in *S. octosporus* chromatin. (D) qChIP analyses for CENP-A<sup>Cnp1</sup> levels at three euchromatic locus between *lys1* and *cen1*: sites i, ii, iii, 25.8, 22, 18 kb from *cc1* respectively in wt-cens or *cc2Δ::cc1* strain with *lys1:cc2*. qChIP results were reported as %IP. All qChIP data are mean ± SD (n=3). ns, no significance; \*, p<0.05; \*\*, p<0.005; \*\*\*, p<0.0005 (Unpaired t-test). (E) Overexpression of CENP-A<sup>Cnp1</sup> leads to growth defect in cells containing centromere-distant *ade3:cc2* insertion. Growth of indicated strains carrying endogenous *cen2 cc2* or *ade3:cc2* or *lys1:cc2* expressing wild-type levels (-; wt-CENP-A<sup>Cnp1</sup>) or high levels of CENP-A<sup>Cnp1</sup> (+; hi-CENP-A<sup>Cnp1</sup>) on plates containing the vital dye phoxine B. Colonies with a higher proportion of dead cells stain darker pink. All strains were grown at 25°C or 32°C for 3-5 days and then photographed. (F) qChIP analyses for CENP-A<sup>Cnp1</sup> levels at *cc2*, *cc1/3* and *act1* in *cc2Δ::cc1*, *nmt41-CENP-A<sup>Cnp1</sup>* strain with *ade3:cc2* insertion expressing wild-type levels (-; wt-CENP-A<sup>Cnp1</sup>) or high levels of CENP-A<sup>Cnp1</sup> (+; hi-CENP-A<sup>Cnp1</sup>). %IP levels in *S. pombe* in were normalized to %IP of central core from spiked-in *S. octosporus* chromatin. All qChIP data are mean ± SD (n=3). hi-CENP-A<sup>Cnp1</sup> expression in A and B is provided by the *nmt41* promoter (*nmt41-CENP-A<sup>Cnp1</sup>* integrated in genome) under no thiamine conditions.



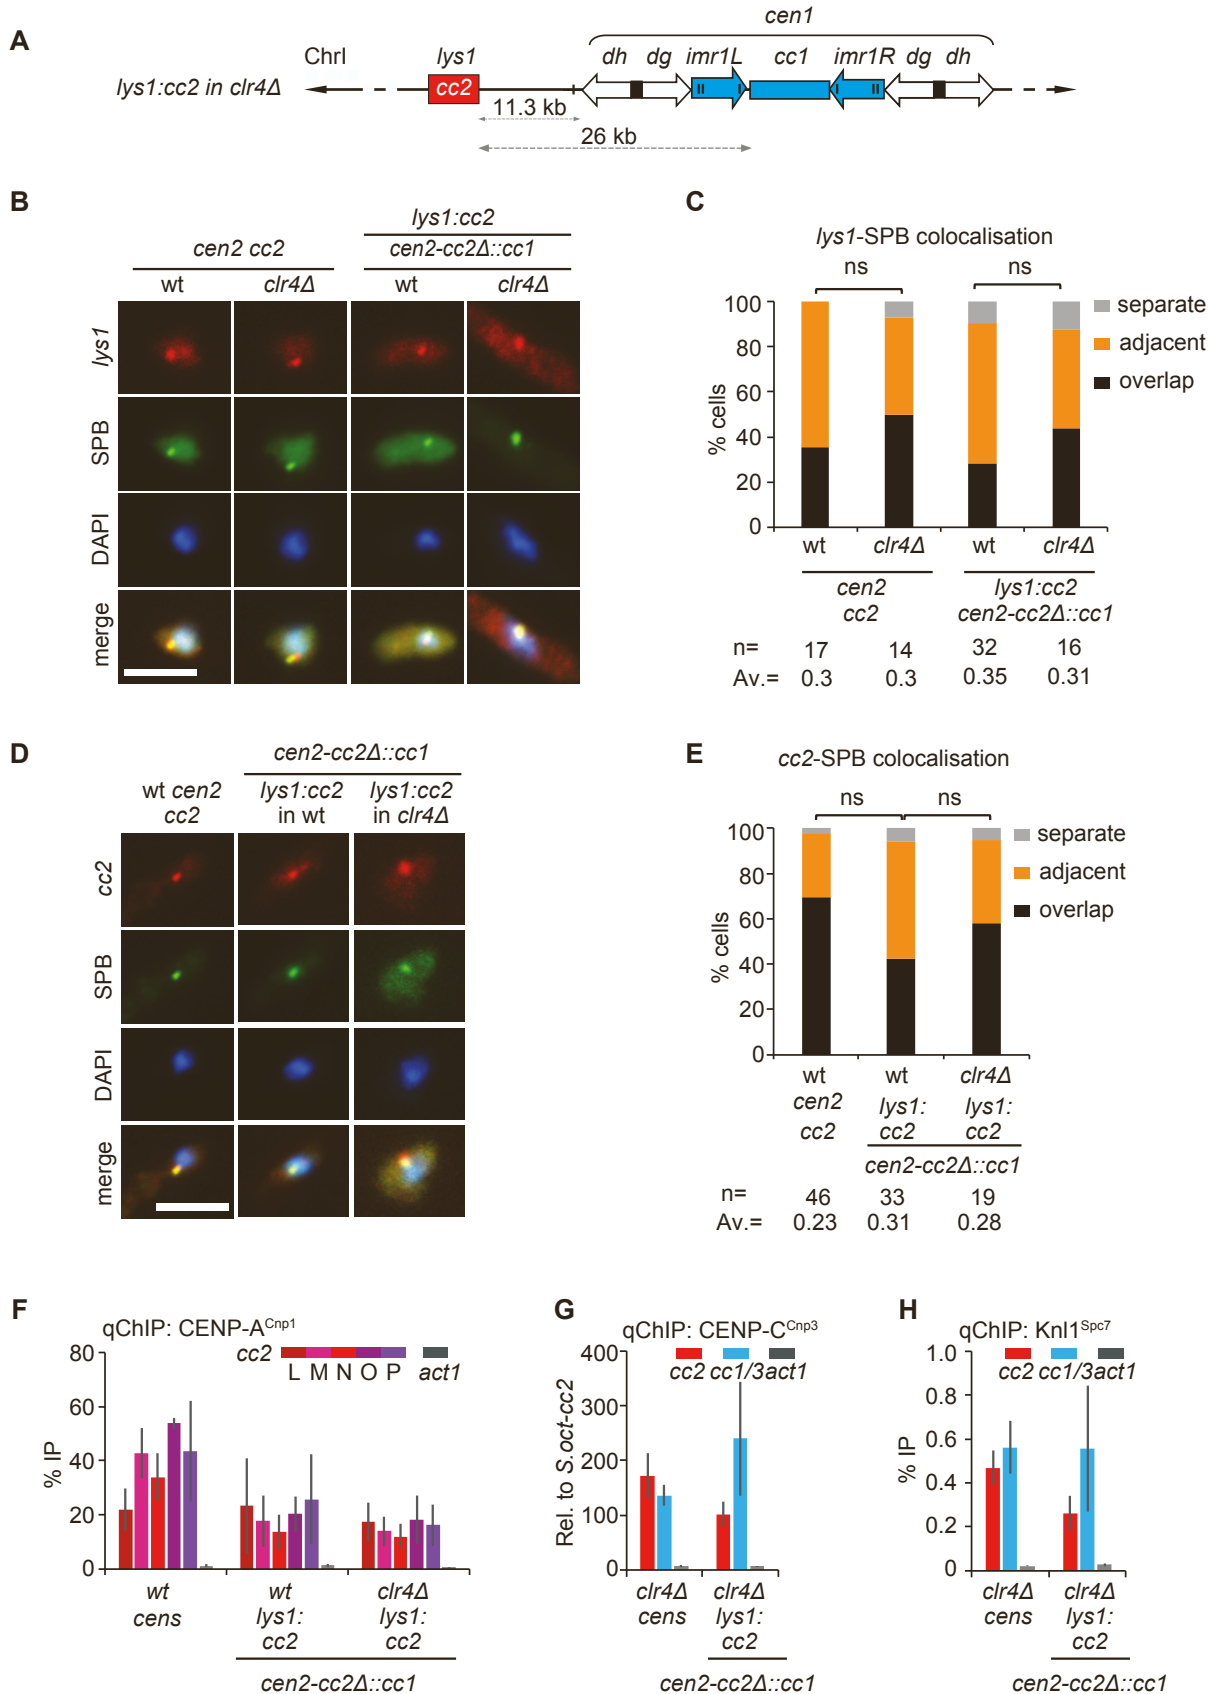

**Figure S5. Centromeric heterochromatin is not required to establish CENP-A<sup>Cnp1</sup> chromatin on *cc2* inserted close to *cen1*. Related to Figure 2.**

(A) Diagram represents *lys1:cc2* insertion, 26 kb or 11.3 kb from *cc1*, *cen1 dh* repeat in heterochromatin-deficient *clr4Δ* cells following transformation, respectively. (B, D) Representative images of *lys1* (B) or *cc2* (D) DNA FISH (red), SPB location (green; anti-Cdc11) and DNA staining (blue, DAPI) in wild-type (wt) or *clr4Δ* strain with endogenous *cen2-cc2* or *cen2-cc2Δ::cc1* and *lys1:cc2*. Images were scaled as in Figure 1. Scale bar, 5 μm. (C, E) Cells were classified into three groups according to the 3D distances between *lys1* (C) or *cc2* (E) and SPB (Cdc11): overlap ( $\leq 0.3$  μm), adjacent (0.3-0.5 μm) or separate (0.5-3 μm). Percentage of interphase cells (n, number analyzed from 3 independent experiments) in each category. AV., average distance. ns, no significance (Mann-Whitney U test). (F-H) qChIP analyses for CENP-A<sup>Cnp1</sup> (F), CENP-C<sup>Cnp3</sup> (G), Knl1<sup>Spc7</sup> (H) levels at *cc2*, *cc1/3* and *act1* wt or *clr4Δ* strain with endogenous *cen2-cc2* or *cen2-cc2Δ::cc1* and *lys1:cc2*. %IP levels in *S. pombe* were normalized to %IP of central core from spiked-in *S. octosporus* chromatin in (G). qChIP results in (F, H) were reported as %IP. Data are mean  $\pm$  SD (n=3).

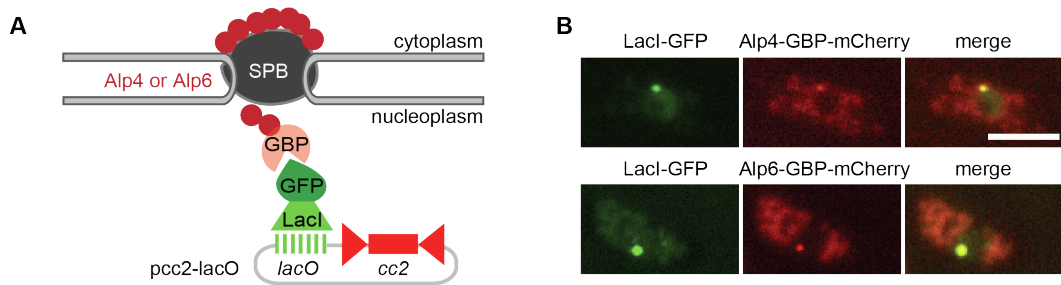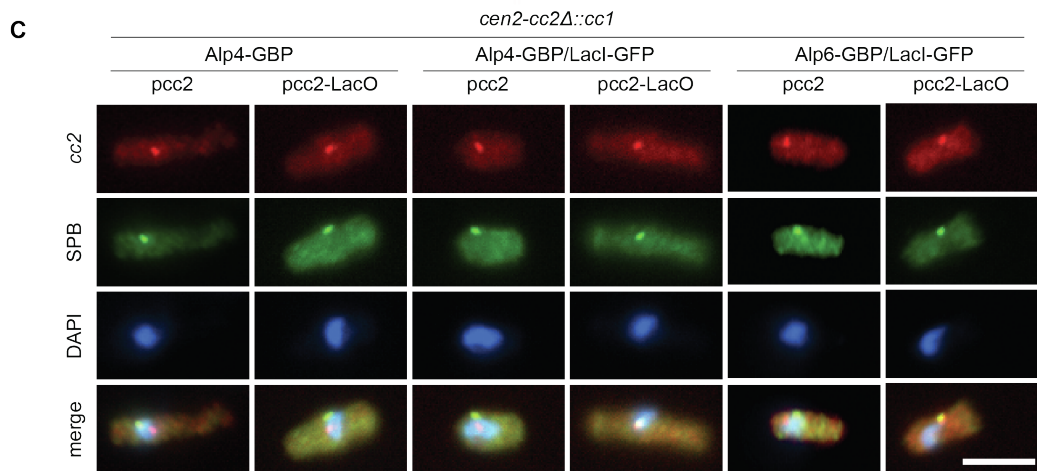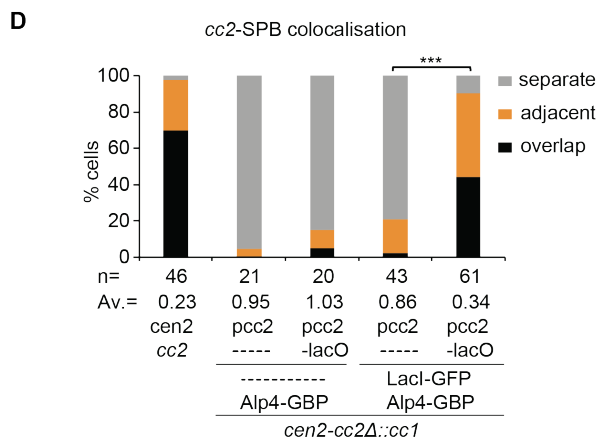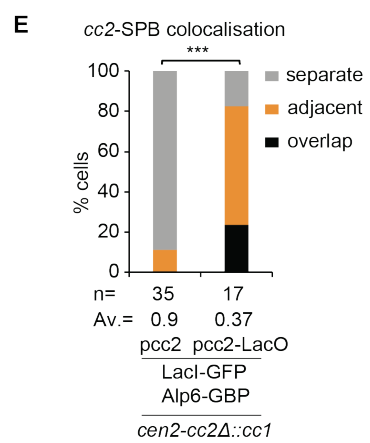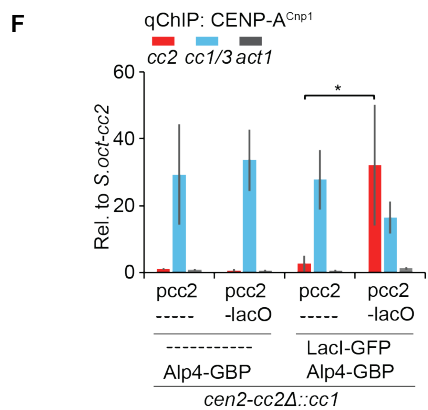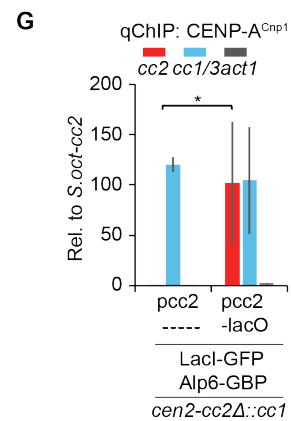

**Figure S6. Tethering *cc2* DNA to Alp4 or Alp6 allows CENP-A<sup>Cnp1</sup> incorporation. Related to Figure 5.**

(A) Forced association of *pcc2-lacO* with Alp4 or Alp6-GBP-mCherry at SPB using same tethering system as in Figure 5. A small subset of Alp4 or Alp6 molecules (red circles) are localized to the nucleoplasmic side of SPB during interphase.<sup>S7</sup> (B) Representative images of live cells expressing LacI-GFP and Alp4 or Alp6-GBP-mCherry. Images were scaled as in Figure 2. Scale bar, 5  $\mu\text{m}$ . (C) Representative images of *cc2* DNA FISH (red), SPB location (green; anti-Cdc11) and DNA staining (blue, DAPI) in indicated strains. Images were scaled as in Figure 1. Scale bar, 5  $\mu\text{m}$ . (D, E) Cells were classified into three groups according to the 3D distances between *cc2* and SPB (Cdc11): overlap ( $\leq 0.3 \mu\text{m}$ ), adjacent (0.3-0.5  $\mu\text{m}$ ) or separate (0.5-3  $\mu\text{m}$ ). Percentage of interphase cells (n, number analyzed from 3 independent experiments) in each category. AV., average distance. \*\*\*,  $p < 0.0001$  (Mann-Whitney U test). (F, G) qChIP analyses for CENP-A<sup>Cnp1</sup> levels at *cc2*, *cc1/3* and *act1* in indicated strains. %IP levels in *S. pombe* were normalized to %IP of central core from spiked-in *S. octosporus* chromatin. Data are mean  $\pm$  SD (n=3-4). \*,  $p < 0.05$  (Unpaired t-test).

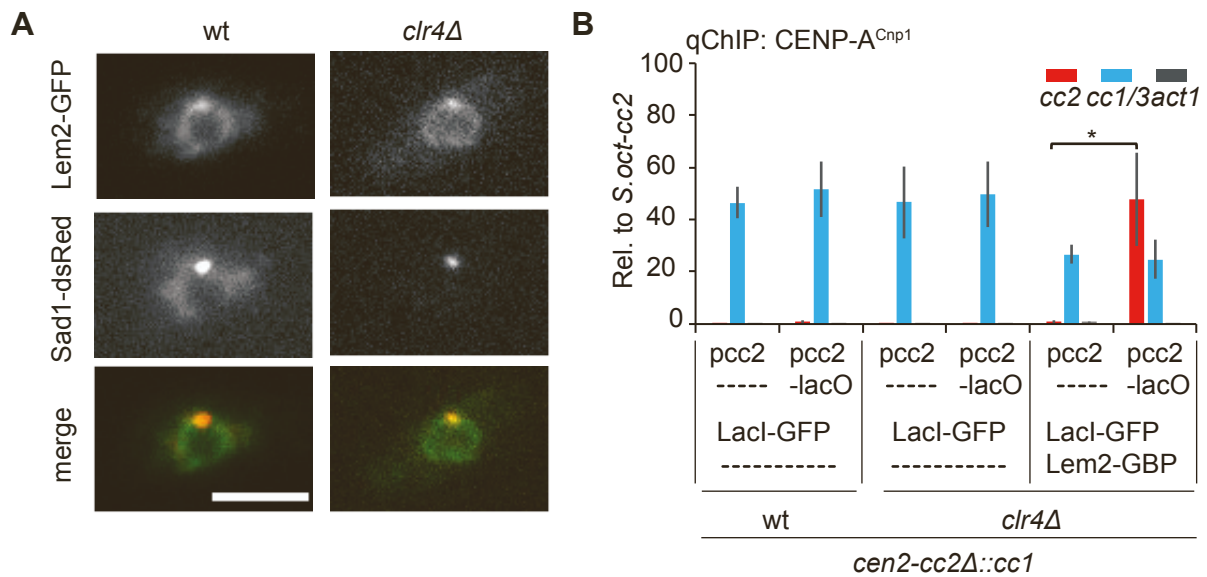

**Figure S7. Tethering *cc2* DNA to Lem2 allows CENP-A<sup>Cnp1</sup> incorporation independently of heterochromatin. Related to Figure 5.**

(A) Representative images of live wild-type (wt) or *clr4Δ* cells expressing Lem2-GFP and Sad1-dsRed. Images were scaled as in Figure 2. Scale bar, 5  $\mu$ m. (B) qChIP analyses for CENP-A<sup>Cnp1</sup> levels at *cc2*, *cc1/3* and *act1* in wt or *clr4Δ* strains carrying *cen2-cc2Δ::cc1* and expressing LacI-GFP or both LacI-GFP and Lem2-GBP-mCherry transformed with *pcc2* or *pcc2-lacO*. %IP levels in *S. pombe* were normalized to %IP of central core from spiked-in *S. octosporus* chromatin. Data are mean  $\pm$  SD (n=3). \*, p<0.05 (Unpaired t-test).

| Strain number | Genotype                                                                                                                                                        | abbreviated as                       |
|---------------|-----------------------------------------------------------------------------------------------------------------------------------------------------------------|--------------------------------------|
| A7374         | <i>h+ ade6-704-HYGMX6 his3-D1 leu1-32 ura4-DSE/D18? arg3? cc2D6kb:cc1</i>                                                                                       | <i>wt cc2Δ::cc1</i>                  |
| B6596         | <i>h+ clr4Δ ade6-704-HYGMX6 his3-D1 leu1-32 ura4-DSE/D18? arg3? cc2D6kb:cc1</i>                                                                                 | <i>clr4Δ</i>                         |
| B3665         | <i>h+ lys1(=cen1):lacO his7+:lacI-GFP, Sad1-dsRed-LEU2+</i>                                                                                                     | <i>lys1:lacO</i>                     |
| B3672         | <i>h? Sad1-dsRed-LEU2+ his7+:lacI-GFP ade3[::kanR-ura4+-lacOp] ade6-704-hygMX6 ura4-DSE/D18 leu1-32? his3-D1? arg3-D4? Lys1-131?#1</i>                          | <i>ade3:lacO</i>                     |
| A1741         | <i>h- ade6-704-HYGMX6 his3-D1 leu1-32 ura4-DSE</i>                                                                                                              | <i>wt cen2</i>                       |
| B2950         | <i>h- lys1Δ500::cc2-KANMX6 ade6-704-HYGMX6 his3-D1 leu1-32 ura4-DSE/D18? arg3? cc2D6kb:cc1#1</i>                                                                | <i>lys1:cc2 #1 or lys1:cc2 in wt</i> |
| B2951         | <i>h- lys1Δ500::cc2-KANMX6 ade6-704-HYGMX6 his3-D1 leu1-32 ura4-DSE/D18? arg3? cc2D6kb:cc1#2</i>                                                                | <i>lys1:cc2 #2</i>                   |
| B2953         | <i>h- ade3Δ500::cc2-KANMX6 ade6-704-HYGMX6 his3-D1 leu1-32 ura4-DSE/D18? arg3? cc2D6kb:cc1#1</i>                                                                | <i>ade3:cc2 #1</i>                   |
| B2954         | <i>h- ade3Δ500::cc2-KANMX6 ade6-704-HYGMX6 his3-D1 leu1-32 ura4-DSE/D18? arg3? cc2D6kb:cc1#2</i>                                                                | <i>ade3:cc2 #2</i>                   |
| A7373         | <i>h- ade6-704-HYGMX6 his3-D1 leu1-32 ura4-DSE/D18? arg3? cc2D6kb:cc1</i>                                                                                       | <i>wt cen1 or wt</i>                 |
| A9792         | <i>h- leu1 ura4 Δcen1::pADH1-loxP-KanR::ura4+ cd60 (neo1R)</i>                                                                                                  | <i>cen1Δ neo1R</i>                   |
| B3269         | <i>h? lys1Δ500::cc2-KANMX6 ade6-704-HYGMX6 cc2D6kb:cc1 cen1Δ::pADH1-loxP-KanR::ura4+ cd60 (neo1R) his3-D1/His+? leu1-32 ura4?/ura4-DSE/D18? arg3?</i>           | <i>lys1:cc2 in neo1R</i>             |
| B3260         | <i>h- ChrI 5,435,010-5,435,237Δ226bp::cc2-KANMX6 cen1Δ::pADH1-loxP-KanR::ura4+ cd60 (neo1R) ade6-704-HYGMX6 cc2D6kb:cc1 his3-D1 leu1-32 ura4-DSE/D18? arg3?</i> | <i>itg6:cc2 in neo1R</i>             |
| B3265         | <i>h- ChrI5,447,816-5,448,235Δ400::cc2-KANMX6 cen1Δ::pADH1-loxP-KanR::ura4+ cd60 (neo1R) ade6-704-HYGMX6 cc2D6kb:cc1 his3-D1 leu1-32 ura4-DSE/D18? arg3?</i>    | <i>itg7:cc2 in neo1R</i>             |
| B3565         | <i>h- ChrI5,501,647-5,502,134Δ528::cc2-KANMX6 cen1Δ::pADH1-loxP-KanR::ura4+ cd60 (neo1R) ade6-704-HYGMX6 cc2D6kb:cc1 his3-D1 leu1-32 ura4-DSE/D18? arg3?</i>    | <i>itg8:cc2 in neo1R</i>             |
| B3561         | <i>h- ChrI5,501,647-5,502,134Δ528::cc2-KANMX6 ade6-704-HYGMX6 his3-D1 leu1-32 ura4-DSE/D18? arg3? cc2D6kb:cc1</i>                                               | <i>itg8:cc2 in wt cen1</i>           |
| B4295         | <i>h+ Lem2-GFP-Nat, Sad1-dsRed-LEU2+ ade6-210 ura4-D18</i>                                                                                                      | <i>Lem2-GFP</i>                      |

|       |                                                                                                                                  |                                      |
|-------|----------------------------------------------------------------------------------------------------------------------------------|--------------------------------------|
| B3437 | <i>h+ his7+:lacI-GFP cc2D6kb:cc1 ura4-DSE/D18? leu1-32 ade6-DNN arg3? his3+</i>                                                  | LacI-GFP                             |
| B4246 | <i>h+ Lem2-GBP-mcherry-Hyg Sad1-dsRed-LEU2+ cc2D6kb:cc1 ade6-210 his3-D1? leu1-32? ura4-DSE/D18? arg3?</i>                       | Lem2-GBP                             |
| B4216 | <i>h+ Lem2-GBP-mcherry-Hyg his7+:lacI-GFP cc2D6kb:cc1 ura4-DSE/D18? leu1-32 ade6-DNN arg3? his3+</i>                             | LacI-GFP<br>Lem2-GBP                 |
| B4339 | <i>h- Lem2-GFP-Nat Sad1-dsRed-LEU2+ Csi1::Kan cc2Δ6kb:cc1 ade6-210 ura4-D18 his3-D1? leu1-32</i>                                 | Lem2-GFP<br><i>csi1Δ</i>             |
| B4866 | <i>h? Lem2-GBP-mcherry-Hyg, his7+:lacI-GFP csi1Δ::KanMX cc2D6kb:cc1 ade6-DNN his3-D1/ his3+? leu1-32 ura4-DSE/D18? arg3?</i>     | LacI-GFP<br>Lem2-GBP<br><i>csi1Δ</i> |
| B4865 | <i>h? Lem2-GBP-mcherry-Hyg csi1Δ::KanMX cc2D6kb:cc1 ade6-DNN his3-D1/his3+? leu1-32 ura4-DSE/D18? arg3?</i>                      | Lem2-GBP<br><i>csi1Δ</i>             |
| B4906 | <i>h? Sad1-dsRed-LEU2+ his7+:lacI-GFP Csi1::Kan cc2Δ6kb:cc1 ade6-704-hygMX6 ura4-DSE/D18 leu1-32 his3-D1? arg3-D4?</i>           | LacI-GFP<br><i>csi1Δ</i>             |
| B3633 | <i>h+ csi1Δ::KanMX cc2Δ6kb:cc1 ade6-704-HYGMX6 his3-D1 leu1-32 ura4-DSE/D18? arg3?</i>                                           | <i>csi1Δ</i>                         |
| B3367 | <i>h- sdh1Δ3344::cc2-KANMX6 ade6-704-HYGMX6 his3-D1 leu1-32 ura4-DSE/D18? arg3? cc2D6kb:cc1</i>                                  | <i>sdh1:cc2</i>                      |
| B3639 | <i>h- SPBC21B10.09-10.08cΔ650::cc2-KANMX6 ade6-704-HYGMX6 his3-D1 leu1-32 ura4-DSE/D18? arg3? cc2D6kb:cc1</i>                    | <i>itg10:cc2</i>                     |
| B3211 | <i>h- SPAC15E1.02cΔ158bp::cc2-KANMX6 ade6-704-HYGMX6 his3-D1 leu1-32 ura4-DSE/D18? arg3? cc2D6kb:cc1</i>                         | <i>bud6:cc2</i>                      |
| B3297 | <i>h- vps29Δ154::cc2-KANMX6 ade6-704-HYGMX6 his3-D1 leu1-32 ura4-DSE/D18? arg3? cc2D6kb:cc1</i>                                  | <i>vps29:cc2</i>                     |
| A7255 | <i>h+ clr4::NAT ade6-210 his3-D1 leu1-32 ura4-D18 arg3-D4 cc2D6kb:cc1</i>                                                        | <i>clr4Δ</i><br><i>cc2Δ::cc1</i>     |
| B3257 | <i>h+ clr4::NAT lys1Δ500::cc2-KANMX6 ade6-210 his3-D1 leu1-32 ura4-D18 arg3-D4 cc2D6kb:cc1</i>                                   | <i>lys1:cc2</i> in<br><i>clr4Δ</i>   |
| 8946  | <i>h- clr4::NAT ade6-210 leu1-32 ura4-D18 arg3-D his3D</i>                                                                       | <i>clr4Δ</i><br><i>cen2 cc2</i>      |
| B5560 | <i>h? cc2Δ6kb:cc1 Alp4-GBP-mcherry-Hyg his7+:lacI-GFP leu1-32 ura4-D18/DS-E ade6-704::hphMX/ade6-DNN? his3? arg3?</i>            | LacI-GFP<br>Alp4-GBP                 |
| B5564 | <i>h? cc2Δ6kb:cc1 Alp4-GBP-mcherry-Hyg leu1-32 ura4-D18/DS-E ade6-704::hphMX/ade6-DNN? his3? arg3?</i>                           | Alp4-GBP                             |
| B5572 | <i>h? cc2Δ6kb:cc1 Alp6-GBP-mcherry-Hyg his7+:lacI-GFP leu1-32 ura4-D18/DS-E ade6-704::hphMX/ade6-DNN? his3? arg3?</i>            | LacI-GFP<br>Alp6-GBP                 |
| B4349 | <i>h- lem2-GBP-mcherry-Hyg, his7+:lacI-GFP, clr4::NAT, cc2D6kb:cc1 ura4-DSE/D18? his3+/his3-D1? arg3? leu1-32 ade6-DNN/ade6?</i> | LacI-GFP<br>Lem2-GBP<br><i>clr4Δ</i> |
| B4351 | <i>h? his7+:lacI-GFP clr4::NAT cc2D6kb:cc1 ura4-DSE/D18? his3+/his3-D1? arg3? leu1-32 ade6-DNN/ade6?</i>                         | LacI-GFP<br><i>clr4Δ</i>             |

|       |                                                                                                                                          |                                               |
|-------|------------------------------------------------------------------------------------------------------------------------------------------|-----------------------------------------------|
| B4343 | <i>h-</i> <i>lem2-GFP-Nat Sad1-dsRed-LEU2+ clr4::hph+ ade6-210 ura4-D18 his3-D1? leu1-32</i>                                             | Lem2-GFP<br><i>clr4Δ</i>                      |
| 1646  | <i>h-</i> <i>ade6-210 arg3-D4 his3-D1 leu1-32 ura4-D18</i>                                                                               | wt                                            |
| B3797 | <i>h+</i> <i>leu1+adh21-TetROFF-2xFLAG-Clr4-cdd</i>                                                                                      | TetR-Clr4                                     |
| B3416 | <i>h-</i> <i>ars1(MluI)::pREP41XCnp1-leu2Sc ade6-704-HYGMX6 leu1-32 arg3-D4? his3-D1 ura4-DSE/D18? cc2D6kb:cc1</i>                       | <i>cen2 cc2, hi</i><br>CENP-A <sup>Cnp1</sup> |
| B6527 | <i>h?</i> <i>ars1(MluI)::pREP41XCnp1-leu2Sc lys1Δ500::cc2-KANMX6, cc2D6kb:cc1 ade6-704-HYGMX6 leu1-32 arg3-D4? his3-D1 ura4-DSE/D18?</i> | <i>lys1:cc2, hi</i><br>CENP-A <sup>Cnp1</sup> |
| B3539 | <i>h?</i> <i>ade3Δ500::cc2-KANMX6 ars1(MluI)::pREP41XCnp1-leu2Sc ade6-704-HYGMX6? leu1-32 arg3-D4? his3-D1 ura4-DSE/D18? cc2D6kb:cc1</i> | <i>ade3:cc2, hi</i><br>CENP-A <sup>Cnp1</sup> |

**Table S1. All strains used in this study. Related to STAR Methods.**



| Name                       | Plasmid features |              |            |        |        |                                              |                          | Notes                                                           | Reference                                      |
|----------------------------|------------------|--------------|------------|--------|--------|----------------------------------------------|--------------------------|-----------------------------------------------------------------|------------------------------------------------|
|                            | marker 1         | marker 2     | marker 3   | cc2    | K''    | <i>lacO</i> or <i>tetO</i>                   | Misc.                    |                                                                 |                                                |
| pMC52                      |                  |              | <i>kan</i> |        |        |                                              |                          | Used for ectopic <i>cc2</i> insertion and <i>cc2</i> FISH probe | This study                                     |
| pMC2 (pcc2)                | <i>ura4</i>      | <i>sup3e</i> | <i>kan</i> | 8.6 kb |        |                                              |                          | Used for tethering assay                                        | This study                                     |
| pMC12 (pcc2- <i>lacO</i> ) | <i>ura4</i>      | <i>sup3e</i> | <i>kan</i> | 8.6 kb |        | 2.8 kb; ~90 <i>lacO</i> sites                |                          | Used for tethering assay                                        | This study                                     |
| pHcc2                      | <i>ura4</i>      | <i>sup3e</i> |            | 8.6 kb | 5.6 kb |                                              |                          | Used for mini-chromosome establishment assay                    | This study                                     |
| pMC183 (pHet)              |                  |              | <i>nat</i> |        | 2 kb   |                                              |                          | Used to check centromeric heterochromatin nuclear localization  | This study                                     |
| pMC1                       | <i>ura4</i>      | <i>sup3e</i> | <i>kan</i> |        |        |                                              |                          | Used for plasmid backbone FISH probe                            | This study                                     |
| pLSB-Kan                   |                  |              | <i>kan</i> |        |        |                                              | Cas9                     | Used to make <i>clr4</i> Δ mutant                               | From Torres-Garcia. <sup>S8</sup>              |
| <i>clr4</i> -pLSB-Kan      |                  |              | <i>kan</i> |        |        |                                              | Cas9 & <i>clr4</i> sgRNA | Used to make <i>clr4</i> Δ mutant                               | This study                                     |
| pFA6a-GBP-mCherry-hygMX6   |                  |              | <i>hyg</i> |        |        |                                              | GBP & mCherry            | Used to make Lem2/Alp4/Alp6-GBP-mCherry-Hyg fusion protein      | Gift from Julia Promisel Cooper. <sup>S9</sup> |
| pFA6a-GFP-NatMX6           |                  |              | <i>nat</i> |        |        |                                              | GFP                      | Used to make Lem2-GFP fusion protein                            | This study                                     |
| pMC171 (ptetO)             |                  |              | <i>nat</i> |        |        | 4xtetO within 2 kb of randomized AT-rich DNA |                          | Used for synthetic heterochromatin assembly                     | This study                                     |

**Table S2. All plasmids used in this study, Related to STAR Methods**

### Supplemental references

S1. Allshire, R.C., and Ekwall, K. (2015). Epigenetic Regulation of Chromatin States in *Schizosaccharomyces pombe*. Cold Spring Harb. Perspect. Biol. 7, a018770.

- S2. Catania, S., Pidoux, A.L., and Allshire, R.C. (2015). Sequence features and transcriptional stalling within centromere DNA promote establishment of CENP-A chromatin. *PLoS Genet.* *11*, e1004986.
- S3. Folco, H.D., Pidoux, A.L., Urano, T., and Allshire, R.C. (2008). Heterochromatin and RNAi are required to establish CENP-A chromatin at centromeres. *Science* *319*, 94-97.
- S4. Kagansky, A., Folco, H.D., Almeida, R., Pidoux, A.L., Boukaba, A., Simmer, F., Urano, T., Hamilton, G.L., and Allshire, R.C. (2009). Synthetic heterochromatin bypasses RNAi and centromeric repeats to establish functional centromeres. *Science* *324*, 1716-1719.
- S5. Bernard, P., Maure, J.F., Partridge, J.F., Genier, S., Javerzat, J.P., and Allshire, R.C. (2001). Requirement of heterochromatin for cohesion at centromeres. *Science* *294*, 2539-2542.
- S6. Nonaka, N., Kitajima, T., Yokobayashi, S., Xiao, G., Yamamoto, M., Grewal, S.I., and Watanabe, Y. (2002). Recruitment of cohesin to heterochromatic regions by Swi6/HP1 in fission yeast. *Nat. Cell Biol.* *4*, 89-93.
- S7. Bestul, A.J., Yu, Z., Unruh, J.R., and Jaspersen, S.L. (2017). Molecular model of fission yeast centrosome assembly determined by superresolution imaging. *J. Cell Biol.* *216*, 2409-2424.
- S8. Torres-Garcia, S., Di Pompeo, L., Eivers, L., Gaborieau, B., White, S.A., Pidoux, A.L., Kanigowska, P., Yaseen, I., Cai, Y., and Allshire, R.C. (2020). SpEDIT: A fast and efficient CRISPR/Cas9 method for fission yeast. *Wellcome Open Res.* *5*, 274.
- S9. Fernández-Álvarez, A., Bez, C., O'Toole, Eileen T., Morphew, M., and Cooper, Julia P. (2016). Mitotic Nuclear Envelope Breakdown and Spindle Nucleation Are Controlled by Interphase Contacts between Centromeres and the Nuclear Envelope. *Dev. Cell* *39*, 544-559.
